# Supplementary material
Source: MDPI journal article supplement (https://www.mdpi.com/1999-4907/14/6/1168)
Supplement: s1 [file s1]

## Supplementary Materials

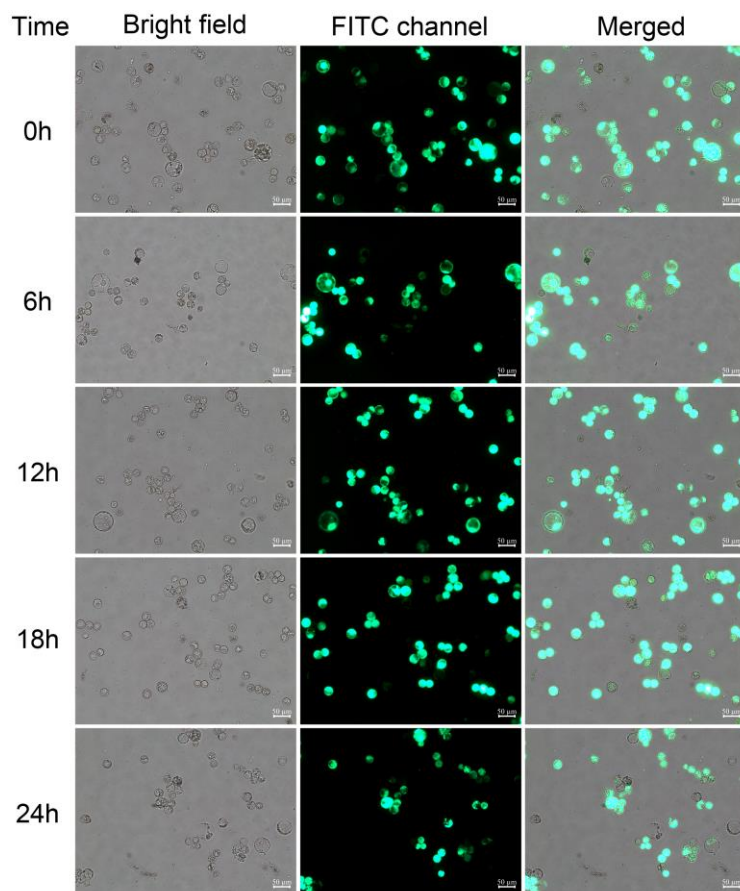

**Figure S1.** Viability test of protoplasts of *C. lanceolata* callus from 0 to 24 h.
